# Supplementary material for: Kozak Similarity Score Algorithm Identifies Alternative Translation Initiation Codons Implicated in Cancers
Source: Preprints.org preprint supplement (doi:10.20944/preprints202208.0413.v1), 2022-08-24
Supplement: Supplementary file 1 [file Supplemental Table 1-Genes Investigated.xlsx]

## Sheet: Sheet1
Gene	Other Names	Overexpressed in Cancer	References
UBE2M	['hUbc12', 'UBC-RS2', 'UBC12']	Yes	Zheng Y-C, Guo Y-J, Wang B, Wang C, Mamun MAA, Gao Y, et al. Targeting neddylation E2s: a novel therapeutic strategy in cancer. Journal of Hematology &amp; Oncology. 2021;14. doi:10.1186/s13045-021-01070-w	Li L, Kang J, Zhang W, Cai L, Wang S, Liang Y, et al. Validation of NEDD8-conjugating enzyme UBC12 as a new therapeutic target in lung cancer. EBioMedicine. Elsevier BV; 2019. pp. 81–91. doi:10.1016/j.ebiom.2019.06.005
GDI1	['1A', 'GDIL', 'MRX41', 'MRX48', 'OPHN2', 'RABGD1A', 'RABGDIA', 'XAP-4', 'XLID41']	Yes	Xie X, Lin H, Zhang X, Song P, He X, Zhong J, et al. Overexpression of GDP dissociation inhibitor 1 gene associates with the invasiveness and poor outcomes of colorectal cancer. Bioengineered. 2021;12: 5595–5606. doi:10.1080/21655979.2021.1967031
TRAPPC12	['CGI-87', 'PEBAS', 'TTC-15', 'TTC15']	Link exists	Erdogan O, Tuncer S, Kilic S, Odemis D, Turkcan G, Celik B, et al. Genome‑wide methylation profiles in monozygotic twins with discordance for ovarian carcinoma. Oncology Letters. Spandidos Publications; 2020. pp. 1–1. doi:10.3892/ol.2020.12221
MORC4	['dJ75H8.2', 'ZCW4', 'ZCWCC2']	Yes	Tencer AH, Cox KL, Wright GM, Zhang Y, Petell CJ, Klein BJ, et al. Molecular mechanism of the MORC4 ATPase activation. Nature Communications. 2020;11. doi:10.1038/s41467-020-19278-8
ORC5	['ORC5L', 'ORC5P', 'ORC5T', 'PPP1R117']	Yes	Su Y, Zeng Z, Rong D, Yang Y, Wu B, Cao Y. PSMC2, ORC5 and KRTDAP are specific biomarkers for HPV‑negative head and neck squamous cell carcinoma. Oncology Letters. 2021;21. doi:10.3892/ol.2021.12550
NOP2	['NOL1', 'NOP120', 'NSUN1', 'p120']	Yes	Kosi N, Alić I, Kolačević M, Vrsaljko N, Jovanov Milošević N, Sobol M, et al. Nop2 is expressed during proliferation of neural stem cells and in adult mouse and human brain. Brain Research. 2015;1597: 65–76. doi:10.1016/j.brainres.2014.11.040	Bi J, Huang Y, Liu Y. Effect of NOP2 knockdown on colon cancer cell proliferation, migration, and invasion. Translational Cancer Research. 2019;8(6):2274-83.
HDGF	['HMG1L2']	Yes	Giri K, Pabelick CM, Mukherjee P, Prakash YS. Hepatoma derived growth factor (HDGF) dynamics in ovarian cancer cells. Apoptosis. 2015;21: 329–339. doi:10.1007/s10495-015-1200-7
CHTOP	['C10orf77', 'C1orf77', 'FL-SRAG', 'FOP', 'pp7704', 'SRAG', 'SRAG-3', 'SRAG-5']	Yes	Feng X, Bai X, Ni J, Wasinger VC, Beretov J, Zhu Y, et al. CHTOP in Chemoresistant Epithelial Ovarian Cancer: A Novel and Potential Therapeutic Target. Frontiers in Oncology. 2019;9. doi:10.3389/fonc.2019.00557
C1orf122	['ALAESM']	Yes	Chen J, Mai H, Chen H, Zhou B, Hou J, Jiang D-K. Pan-Cancer Analysis Identified C1ORF112 as a Potential Biomarker for Multiple Tumor Types. Frontiers in Molecular Biosciences. 2021;8. doi:10.3389/fmolb.2021.693651
ZNF48	['ZNF553']	Yes	Guerrero Llobet S, Bhattacharya A, Everts M, Kok K, van der Vegt B, Fehrmann RSN, et al. An mRNA expression-based signature for oncogene-induced replication-stress. Oncogene. 2022;41: 1216–1224. doi:10.1038/s41388-021-02162-0
FXR2	['FMR1L2', 'FXR2P']	Yes	George J, Li Y, Kadamberi IP, Parashar D, Tsaih S-W, Gupta P, et al. RNA-binding protein FXR1 drives cMYC translation by recruiting eIF4F complex to the translation start site. Cell Reports. 2021;37: 109934. doi:10.1016/j.celrep.2021.109934
HM13	['H13', 'IMP1', 'IMPAS', 'IMPAS-1', 'MSTP086', 'PSENL3', 'PSL3', 'SPP', 'SPPL1']	Yes	Zhou J, Cheng T, Li X, Hu J, Li E, Ding M, et al. Epigenetic imprinting alterations as effective diagnostic biomarkers for early-stage lung cancer and small pulmonary nodules. Clinical Epigenetics. 2021;13. doi:10.1186/s13148-021-01203-5	Goovaerts T, Steyaert S, Vandenbussche CA, Galle J, Thas O, Van Criekinge W, et al. A comprehensive overview of genomic imprinting in breast and its deregulation in cancer. Nature Communications. Springer Science and Business Media LLC; 2018. doi:10.1038/s41467-018-06566-7	Wei J-W, Cai J-Q, Fang C, Tan Y-L, Huang K, Yang C, et al. Signal Peptide Peptidase, Encoded byHM13, Contributes to Tumor Progression by Affecting EGFRvIII Secretion Profiles in Glioblastoma. CNS Neuroscience &amp; Therapeutics. Wiley; 2017. pp. 257–265. doi:10.1111/cns.12672
RNF31	['HOIP', 'Paul', 'ZIBRA']	Yes	Kharman-Biz A, Gao H, Ghiasvand R, Haldosen L-A, Zendehdel K. Expression of the three components of linear ubiquitin assembly complex in breast cancer. Ahmad A, editor. PLOS ONE. 2018;13: e0197183. doi:10.1371/journal.pone.0197183
USP33	['VDU1']	Yes	Guo F, Zhang C, Wang F, Zhang W, Shi X, Zhu Y, et al. Deubiquitinating enzyme USP33 restrains docetaxel-induced apoptosis via stabilising the phosphatase DUSP1 in prostate cancer. Cell Death &amp; Differentiation. 2019;27: 1938–1951. doi:10.1038/s41418-019-0473-8
MAF	['AYGRP', 'c-MAF', 'CCA4', 'CTRCT21']	Yes	Pavlovic M, Arnal-Estapé A, Rojo F, Bellmunt A, Tarragona M, Guiu M, et al. Enhanced MAF Oncogene Expression and Breast Cancer Bone Metastasis. Journal of the National Cancer Institute. Oxford University Press (OUP); 2015. p. djv256. doi:10.1093/jnci/djv256
KCTD9	['BTBD27']	Yes	Angrisani A, Di Fiore A, De Smaele E, Moretti M. The emerging role of the KCTD proteins in cancer. Cell Communication and Signaling. 2021;19. doi:10.1186/s12964-021-00737-8
USP9X	['DFFRX', 'FAF', 'FAM', 'MRX99', 'MRXS99F', 'XLID99']	Yes	Wang Y, Liu Y, Yang B, Cao H, Yang CX, Ouyang W, et al. Elevated expression of USP9X correlates with poor prognosis in human non-small cell lung cancer. J Thorac Dis 2015;7(4):672-679. doi: 10.3978/j.issn.2072-1439.2015.04.28
GNPNAT1	['GNA1', 'GNPNAT', 'Gpnat1', 'RHZDAN']	Yes	Liu W, Jiang K, Wang J, Mei T, Zhao M, Huang D. Upregulation of GNPNAT1 Predicts Poor Prognosis and Correlates With Immune Infiltration in Lung Adenocarcinoma. Frontiers in Molecular Biosciences. 2021;8. doi:10.3389/fmolb.2021.605754
STARD10	['CGI-52', 'NY-CO-28', 'PCTP2', 'SDCCAG28']	Yes	Chlebowski RT, Luo J, Anderson GL, Barrington W, Reding K, Simon MS, et al. Weight loss and breast cancer incidence in postmenopausal women. Cancer. 2018;125: 205–212. doi:10.1002/cncr.31687
NARS1	['ASNRS', 'NARS', 'NEDMILEG', 'NEDMILG']	Yes	Sung Y, Yoon I, Han JM, Kim S. Functional and pathologic association of aminoacyl-tRNA synthetases with cancer. Experimental &amp; Molecular Medicine. 2022;54: 553–566. doi:10.1038/s12276-022-00765-5
RANBP2	['ADANE', 'ANE1', 'IIAE3', 'NUP358', 'TRP1', 'TRP2']	Yes	Huang X, Zhao J, Fu W, Zhu J, Lou S, Tian X, et al. The association of RAN and RANBP2 gene polymerphisms with Wilms tumor risk in Chinese children. Journal of Cancer. 2020;11: 804–809. doi:10.7150/jca.36651
RGPD6	['RanBP2L1', 'RanBP2L2', 'RGP6', 'RGPD7']	Link exists	Zhang J, Fan J, Zhou C, Qi Y. miR-363-5p as potential prognostic marker for hepatocellular carcinoma indicated by weighted co-expression network analysis of miRNAs and mRNA. BMC Gastroenterology. Springer Science and Business Media LLC; 2017. doi:10.1186/s12876-017-0637-2
SLF2	['C10orf6', 'FAM178A']
SLC35A3	['AMRS']	Yes	Markolin P, Davidson N, Hirt CK, Chabbert CD, Zamboni N, Schwank G, et al. Identification of HIF-dependent alternative splicing in gastrointestinal cancers and characterization of a long, coding isoform of SLC35A3. Genomics. 2021;113: 515–529. doi:10.1016/j.ygeno.2020.12.039
MARCHF5	['MARCH-V', 'MARCH5', 'MITOL', 'RNF153']	Yes	Hu J, Meng Y, Zhang Z, Yan Q, Jiang X, Lv Z, et al. MARCH5 RNA promotes autophagy, migration, and invasion of ovarian cancer cells. Autophagy. 2016;13: 333–344. doi:10.1080/15548627.2016.1256520
KCTD3	['NY-REN-45']	Yes	Angrisani A, Di Fiore A, De Smaele E, Moretti M. The emerging role of the KCTD proteins in cancer. Cell Communication and Signaling. 2021;19. doi:10.1186/s12964-021-00737-8
HNRNPAB	['ABBP1', 'HNRPAB']	Yes	Zhou Z-J, Dai Z, Zhou S-L, Hu Z-Q, Chen Q, Zhao Y-M, et al. HNRNPAB Induces Epithelial–Mesenchymal Transition and Promotes Metastasis of Hepatocellular Carcinoma by Transcriptionally Activating SNAIL. Cancer Research. 2014;74: 2750–2762. doi:10.1158/0008-5472.can-13-2509
OXSR1	['OSR1']	Yes	Li Y, Qin J, Wu J, Dai X, Xu J. High expression of OSR1 as a predictive biomarker for poor prognosis and lymph node metastasis in breast cancer. Breast Cancer Research and Treatment. 2020;182: 35–46. doi:10.1007/s10549-020-05671-w
YTHDC1	['YT521', 'YT521-B']	Yes	Sheng Y, Wei J, Yu F, Xu H, Yu C, Wu Q, et al. A critical role of nuclear m6A reader YTHDC1 in leukemogenesis by regulating MCM complex–mediated DNA replication. Blood. 2021;138: 2838–2852. doi:10.1182/blood.2021011707
TXN	['TRDX', 'TRX', 'TRX1', 'Trx80']	Yes	Lim JY. Thioredoxin and thioredoxin-interacting protein as prognostic markers for gastric cancer recurrence. World Journal of Gastroenterology. 2012;18: 5581. doi:10.3748/wjg.v18.i39.5581
TCAF1	['FAM115A', 'GATD9A']	Yes	Strand SH, Switnicki M, Moller M, Haldrup C, Storebjerg TM, Hedegaard J, et al. RHCG and TCAF1 promoter hypermethylation predicts biochemical recurrence in prostate cancer patients treated by radical prostatectomy. Oncotarget. 2016;8: 5774–5788. doi:10.18632/oncotarget.14391
IFT46	['C11orf2', 'C11orf60', 'CFAP32']	Link exists	Menzl I, Lebeau L, Pandey R, Hassounah NB, Li FW, Nagle R, et al. Loss of primary cilia occurs early in breast cancer development. Cilia. Springer Science and Business Media LLC; 2014. doi:10.1186/2046-2530-3-7	Shen J, Chen C, Li Z, Hu S. Paclitaxel Promotes Tumor-Infiltrating Macrophages in Breast Cancer. Technology in Cancer Research &amp; Treatment. SAGE Publications; 2020. p. 153303382094582. doi:10.1177/1533033820945821
SATB2	['GLSS']	Yes	Yu W, Ma Y, Shankar S, Srivastava RK. SATB2/β-catenin/TCF-LEF pathway induces cellular transformation by generating cancer stem cells in colorectal cancer. Scientific Reports. 2017;7(1):10939. doi: 10.1038/s41598-017-05458-y
ZNF281	['GZP1', 'ZBP-99', 'ZBP99', 'ZNP-99']	Yes	Qin CJ, Bu PL, Zhang Q, Chen JT, Li QY, Liu JT, et al. ZNF281 Regulates Cell Proliferation, Migration and Invasion in Colorectal Cancer through Wnt/β-Catenin Signaling. Cell Physiol Biochem. 2019;52(6):1503-1516. doi: 10.33594/000000104
NME1-NME2	['NM23-LV', 'NMELV']	Yes	Leary JA, Kerr J, Chenevix-Trench G, Doris CP, Hurst T, Houghton CRS, et al. Increased expression of the nme1 gene is associated with metastasis in epithelial ovarian cancer. International Journal of Cancer. 1995;64: 189–195. doi:10.1002/ijc.2910640308
GYS1	['GSY', 'GYS']	Yes	Chen S, Huang Q, Huang Y, Yang X, Yang M, He Y, et al. GYS1 induces glycogen accumulation and promotes tumor progression via the NF-κB pathway in Clear Cell Renal Carcinoma. Theranostics. 2020;10: 9186–9199. doi:10.7150/thno.46825	Falantes JF, Trujillo P, Piruat JI, Calderón C, Márquez-Malaver FJ, Martín-Antonio B, et al. Overexpression of GYS1, MIF, and MYC Is Associated With Adverse Outcome and Poor Response to Azacitidine in Myelodysplastic Syndromes and Acute Myeloid Leukemia. Clinical Lymphoma Myeloma and Leukemia. Elsevier BV; 2015. pp. 236–244. doi:10.1016/j.clml.2014.10.003
NDUFA2	['B8', 'CD14', 'CIB8', 'MC1DN13']	Yes	Bi G, Bian Y, Liang J, Yin J, Li R, Zhao M, et al. Pan-cancer characterization of metabolism-related biomarkers identifies potential therapeutic targets. Journal of Translational Medicine. 2021;19. doi:10.1186/s12967-021-02889-0
KAT7	['HBO1', 'HBOA', 'MYST2', 'ZC2HC7']	Yes	Ma Y, Chen X, Ding T, Zhang H, Zhang Q, Dai H, et al. KAT7 promotes radioresistance through upregulating PI3K/AKT signaling in breast cancer. 2022. doi:10.21203/rs.3.rs-1477649/v1
INTS8	['C8orf52', 'INT8', 'NEDCHS']	Yes	Zhou Q, Ji L, Shi X, Deng D, Guo F, Wang Z, et al. INTS8 is a therapeutic target for intrahepatic cholangiocarcinoma via the integration of bioinformatics analysis and experimental validation. Scientific Reports. 2021;11. doi:10.1038/s41598-021-03017-0
AP3D1	['ADTD', 'hBLVR', 'HPS10']	Yes	Li H, Li M, Tang C, Xu L. Screening and prognostic value of potential biomarkers for ovarian cancer. Annals of Translational Medicine. 2021;9: 1007–1007. doi:10.21037/atm-21-2627
RPRD2	['HSPC099', 'KIAA0460']	Yes	Wang Y, Qiu H, Hu W, Li S, Yu J. RPRD1B promotes tumor growth by accelerating the cell cycle in endometrial cancer. Oncology Reports. 2014;31: 1389–1395. doi:10.3892/or.2014.2990	Zhang Y, Liu C, Duan X, Ren F, Li S, Jin Z, et al. CREPT/RPRD1B, a Recently Identified Novel Protein Highly Expressed in Tumors, Enhances the β-Catenin·TCF4 Transcriptional Activity in Response to Wnt Signaling. Journal of Biological Chemistry. Elsevier BV; 2014. pp. 22589–22599. doi:10.1074/jbc.m114.560979
TP53	['BCC7', 'BMFS5', 'LFS1', 'P53', 'TRP53']	Yes	Olivier M, Hollstein M, Hainaut P. TP53 Mutations in Human Cancers: Origins, Consequences, and Clinical Use. Cold Spring Harbor Perspectives in Biology. 2009;2: a001008–a001008. doi:10.1101/cshperspect.a001008
TM9SF3	['EP70-P-iso', 'SMBP']	Yes	Shen L, Du X, Ma H, Mei S. miR-1193 Suppresses the Proliferation and Invasion of Human T-Cell Leukemia Cells Through Directly Targeting the Transmembrane 9 Superfamily 3 (TM9SF3). Oncology Research Featuring Preclinical and Clinical Cancer Therapeutics. 2017;25: 1643–1651. doi:10.3727/096504017x14908284471361
ACOT7	['ACH1', 'ACT', 'BACH', 'CTE-II', 'hBACH', 'LACH', 'LACH1']	Yes	Jung SH, Lee HC, Hwang HJ, Park HA, Moon Y-A, Kim BC, et al. Acyl-CoA thioesterase 7 is involved in cell cycle progression via regulation of PKCζ–p53–p21 signaling pathway. Cell Death &amp; Disease. 2017;8: e2793–e2793. doi:10.1038/cddis.2017.202
UBE2J2	['NCUBE-2', 'NCUBE2', 'PRO2121', 'UBC6']	Yes	Chen S, Tan Y, Deng H, Shen Z, Liu Y, Wu P, et al. UBE2J2 promotes hepatocellular carcinoma cell epithelial-mesenchymal transition and invasion in vitro. Oncotarget. 2017;8: 71736–71749. doi:10.18632/oncotarget.17601
PGRMC1	['Dap1', 'HPR6.6', 'IZA', 'MPR']	Yes	Zhao Y, Ruan X. Identification of PGRMC1 as a Candidate Oncogene for Head and Neck Cancers and Its Involvement in Metabolic Activities. Frontiers in Bioengineering and Biotechnology. 2020;7. doi:10.3389/fbioe.2019.00438	Pedroza DA, Rajamanickam V, Subramani R, Bencomo A, Galvez A, Lakshmanaswamy R. Progesterone receptor membrane component 1 promotes the growth of breast cancers by altering the phosphoproteome and augmenting EGFR/PI3K/AKT signalling. British Journal of Cancer. Springer Science and Business Media LLC; 2020. pp. 1326–1335. doi:10.1038/s41416-020-0992-6
CDV3	['H41']	Yes	Xiao H, Zhou B, Jiang N, Cai Y, Liu X, Shi Z, et al. The potential value of CDV3 in the prognosis evaluation in Hepatocellular carcinoma. Genes &amp; Diseases. 2018;5: 167–171. doi:10.1016/j.gendis.2018.01.003
CLK2	['H41']	Yes	Yoshida T, Kim JH, Carver K, Su Y, Weremowicz S, Mulvey L, et al. CLK2 Is an Oncogenic Kinase and Splicing Regulator in Breast Cancer. Cancer Res. 2015 Apr 1;75(7):1516-26. doi: 10.1158/0008-5472.CAN-14-2443
ZC3H10	['ZC3HDC10']	Yes	Giri K, Pabelick CM, Mukherjee P, Prakash YS. Hepatoma derived growth factor (ZC3H10) dynamics in ovarian cancer cells. Apoptosis. 2015;103: 329–339. doi:10.1007/s10495-015-1200-49
RPL35A	['DBA5', 'eL33', 'L35A']	Yes	Wu F, Sun D, Liao Y, Shang K, Lu C. RPL35A is a key promotor involved in the development and progression of gastric cancer. Cancer Cell International. 2021;21. doi:10.1186/s12935-021-02199-x
TNPO1	['IPO2', 'KPNB2', 'MIP', 'MIP1', 'TRN']	Yes	Shahan Mamoor. Over-expression of transportin 1 in human endometrial cancer. Unpublished. 2021. doi:10.13140/RG.2.2.16466.27842
HNRNPR	['hnRNP-R', 'HNRPR']	Yes	Chen E-B, Qin X, Peng K, Li Q, Tang C, Wei Y-C, et al. HnRNPR-CCNB1/CENPF axis contributes to gastric cancer proliferation and metastasis. Aging. 2019;11: 7473–7491. doi:10.18632/aging.102254
HSP90AA1	['EL52', 'HEL-S-65p', 'Hsp103', 'HSP86', 'Hsp89', 'HSP89A', 'Hsp90', 'HSP90A', 'HSP90N', 'HSPC1', 'HSPCA', 'HSPCAL1', 'HSPCAL4', 'HSPN', 'LAP-2', 'LAP2']	Yes	Xiao X, Wang W, Li Y, Yang D, Li X, Shen C, et al. HSP90AA1-mediated autophagy promotes drug resistance in osteosarcoma. Journal of Experimental &amp; Clinical Cancer Research. 2018;37. doi:10.1186/s13046-018-0880-6
KRT23	['CK23', 'HAIK1', 'K23']	Yes	Ren M, Gao Y, Chen Q, Zhao H, Zhao X, Yue W. The Overexpression of Keratin 23 Promotes Migration of Ovarian Cancer via Epithelial-Mesenchymal Transition. Imazeki F, editor. BioMed Research International. 2020;2020: 1–12. doi:10.1155/2020/8218735
RGS14	['CK23', 'HAIK1', 'K23']	Yes	Cho H, Kim D-U, Kehrl JH. RGS14 Is a Centrosomal and Nuclear Cytoplasmic Shuttling Protein That Traffics to Promyelocytic Leukemia Nuclear Bodies Following Heat Shock. Journal of Biological Chemistry. 2005;280: 805–814. doi:10.1074/jbc.m408163200
EPB41L3	['4.1B', 'DAL-1', 'DAL1']	Yes	Yuan X, Piao L, Wang L, Han X, Tong L, Shao S, et al. Erythrocyte membrane protein band 4.1-like 3 inhibits osteosarcoma cell invasion through regulation of Snai1-induced epithelial-to-mesenchymal transition. Aging. 2020;13: 1947–1961. doi:10.18632/aging.202158
SLC4A4	['hhNMC', 'HNBC1', 'KNBC', 'kNBC1', 'NBC1', 'NBC2', 'NBCe1-A', 'pNBC', 'SLC4A5']	Yes	Parks SK, Pouyssegur J. The Na+/HCO3−Co-Transporter SLC4A4 Plays a Role in Growth and Migration of Colon and Breast Cancer Cells. Journal of Cellular Physiology. 2015;230: 1954–1963. doi:10.1002/jcp.24930
ZDHHC2	['DHHC2', 'ZNF372']	Link exists	Peng C, Zhang Z, Wu J, Lv Z, Tang J, Xie H, et al. A Critical Role for ZDHHC2 in Metastasis and Recurrence in Human Hepatocellular Carcinoma. BioMed Research International. Hindawi Limited; 2014. pp. 1–9. doi:10.1155/2014/832712
TNS1	['MST091', 'MST122', 'MST127', 'MSTP091', 'MSTP122', 'MSTP127', 'MXRA6', 'PPP1R155', 'TNS']	Yes	Zhou H, Zhang Y, Wu L, Xie W, Li L, Yuan Y, et al. Elevated transgelin/TNS1 expression is a potential biomarker in human colorectal cancer. Oncotarget. 2017;9: 1107–1113. doi:10.18632/oncotarget.23275
YBX1	['BP-8', 'CBF-A', 'CSDA2', 'CSDB', 'DBPB', 'EFI-A', 'MDR-NF1', 'NSEP-1', 'NSEP1', 'YB-1', 'YB1']	Yes	Prabhu L, Hartley A-V, Martin M, Warsame F, Sun E, Lu T. Role of post-translational modification of the Y box binding protein 1 in human cancers. Genes &amp; Diseases. 2015;2: 240–246. doi:10.1016/j.gendis.2015.05.001
ICE1	['KIAA0947']	Yes	Ferlay J, Soerjomataram I, Dikshit R, Eser S, Mathers C, Rebelo M, et al. Cancer incidence and mortality worldwide: Sources, methods and major patterns in GLOBOCAN 2012. International Journal of Cancer. 2014;136: E359–E386. doi:10.1002/ijc.29210
STOM	['BND7', 'EPB7', 'EPB72']	Yes	Chen AH, Tsau Y-W, Lin C-H. Novel methods to identify biologically relevant genes for leukemia and prostate cancer from gene expression profiles. BMC Genomics. 2010;11: 274. doi:10.1186/1471-2164-11-274
PPP2R5A	['B56A', 'B56alpha', 'PR61A']	Yes	Cunningham CE, Li S, Vizeacoumar FS, Bhanumathy KK, Lee JS, Parameswaran S, et al. Therapeutic relevance of the protein phosphatase 2A in cancer. Oncotarget. 2016 Sep 20;7(38):61544-61561. doi: 10.18632/oncotarget.11399
NMNAT3	['FKSG76', 'PNAT-3', 'PNAT3']	Yes	Shackelford RE, Mayhall K, Maxwell NM, Kandil E, Coppola D. Nicotinamide phosphoribosyltransferase in malignancy: a review. Genes Cancer. 2013 Nov;4(11-12):447-56. doi: 10.1177/1947601913507576
LMOD1	['1D', '64kD', 'D1', 'MMIHS3', 'SM-LMOD', 'SMLMOD']	Yes	Tan Y, Chen Q, Pan S, An W, Xu H, Xing Y, et al. LMOD1, an oncogene associated with Lauren classification, regulates the metastasis of gastric cancer cells through the FAK-AKT/mTOR pathway. BMC Cancer. 2022;22. doi:10.1186/s12885-022-09541-0
MYLK	['AAT7', 'KRP', 'MLCK', 'MLCK1', 'MLCK108', 'MLCK210', 'MMIHS', 'MMIHS1', 'MSTP083', 'MYLK-L', 'MYLK1', 'smMLCK']	Yes	Foroumadi R, Rashedi S, Asgarian S, Mardani M, Keykhaei M, Farrokhpour H, et al. Circular RNA MYLK as a prognostic biomarker in patients with cancers: A systematic review and meta‐analysis. Cancer Reports. 2022. doi:10.1002/cnr2.1653
KHK	['FRUCTU']	Yes	Kim J, Kang J, Kang Y-L, Woo J, Kim Y, Huh J, et al. Ketohexokinase-A acts as a nuclear protein kinase that mediates fructose-induced metastasis in breast cancer. Nature Communications. 2020;11. doi:10.1038/s41467-020-19263-1
RHOC	['ARH9', 'ARHC', 'H9', 'RHOH9']	Yes	Lou Y, Jiang Y, Liang Z, Liu B, Li T, Zhang D. Role of RhoC in cancer cell migration. Cancer Cell International. 2021;21. doi:10.1186/s12935-021-02234-x
CDR2	['CDR62', 'Yo']	Yes	O’Donovan KJ, Diedler J, Couture GC, Fak JJ, Darnell RB. The Onconeural Antigen cdr2 Is a Novel APC/C Target that Acts in Mitosis to Regulate C-Myc Target Genes in Mammalian Tumor Cells. Gartel AL, editor. PLoS ONE. 2010;5: e10045. doi:10.1371/journal.pone.0010045
ANKS1B	['AIDA', 'AIDA-1', 'ANKS2', 'cajalin-2', 'EB-1', 'EB1']	Yes	Yang H, Liu Y, Li C, Liu Y, Zhao L, Wang Y, et al. circ-ANKS1B facilitates osteosarcoma cell proliferation and invasiveness via upregulating Ki-67 expression by sponging miR-149-5p. 2020. doi:10.21203/rs.2.22619/v2
THOP1	['EP24.15', 'MEPD_HUMAN', 'MP78', 'TOP']	Link exists	Qi L, Li S, Si L, Lu M, Tian H. Expression of THOP1 and Its Relationship to Prognosis in Non-Small Cell Lung Cancer. Coppola D, editor. PLoS ONE. Public Library of Science (PLoS); 2014. p. e106665. doi:10.1371/journal.pone.0106665
NAPB	['SNAP-BETA', 'SNAPB']	Yes	Head SA, Hernandez-Alias X, Yang J-S, Ciampi L, Beltran-Sastre V, Torres-Méndez A, et al. Silencing of SRRM4 suppresses microexon inclusion and promotes tumor growth across cancers. Misteli T, editor. PLOS Biology. 2021;19: e3001138. doi:10.1371/journal.pbio.3001138
RHOT1	['ARHT1', 'MIRO-1', 'MIRO1']	Yes	Li Q, Yao L, Wei Y, Geng S, He C, Jiang H. Role of RHOT1 on migration and proliferation of pancreatic cancer. Am J Cancer Res. 2015 Mar 15;5(4):1460-70
TRMT6	['CGI-09', 'GCD10', 'Gcd10p']	Yes	Su Z, Monshaugen I, Wilson B, Wang F, Klungland A, Ougland R, et al. TRMT6/61A-dependent base methylation of tRNA-derived fragments regulates gene-silencing activity and the unfolded protein response in bladder cancer. Nature Communications. 2022;13. doi:10.1038/s41467-022-29790-8
HSPB1	['CMT2F', 'HEL-S-102', 'HMN2B', 'HS.76067', 'HSP27', 'HSP28', 'Hsp25', 'SRP27']	Yes	Gibert B, Eckel B, Gonin V, Goldschneider D, Fombonne J, Deux B, et al. Targeting heat shock protein 27 (HspB1) interferes with bone metastasis and tumour formation in vivo. British Journal of Cancer. 2012;107: 63–70. doi:10.1038/bjc.2012.188
ARL6IP5	['addicsin', 'DERP11', 'GTRAP3-18', 'hp22', 'HSPC127', 'jmx', 'JWA', 'PRAF3', 'Yip6b']	Link exists	Kim J-Y, Bahar E, Lee J-Y, Chang S, Kim SH, Park EY, et al. ARL6IP5 reduces cisplatin-resistance by suppressing DNA repair and promoting apoptosis pathways in ovarian carcinoma. Cell Death &amp; Disease. Springer Science and Business Media LLC; 2022. doi:10.1038/s41419-022-04568-4
VAT1	['VATI']	Yes	Shan X, Wang K, Tong X, Wang Z, Wu F, Liu X, et al. High expression of VAT1 is a prognostic biomarker and predicts malignancy in glioblastoma. Oncology Reports. 2019. doi:10.3892/or.2019.7276
CNP	['CNP1', 'HLD20']	Yes	Peng W, zhu R, Zhou S, Mirzaei P, Mechref Y. Integrated Transcriptomics, Proteomics, and Glycomics Reveals the Association between Up-regulation of Sialylated N-glycans/Integrin and Breast Cancer Brain Metastasis. Scientific Reports. 2019;9. doi:10.1038/s41598-019-53984-8
ABLIM1	['ABLIM', 'abLIM-1', 'LIMAB1', 'LIMATIN']	Yes	Chen X, Zhang J, Dai X. DNA methylation profiles capturing breast cancer heterogeneity. BMC Genomics. 2019;20. doi:10.1186/s12864-019-6142-y
SEPTIN9	['AF17q25', 'MSF', 'MSF1', 'NAPB', 'PNUTL4', 'SEPT9', 'SeptD1', 'SINT1']	Yes	Montagna C, Lyu M-S, Hunter K, Lukes L, Lowther W, Reppert T, et al. The Septin 9 (MSF) Gene Is Amplified and Overexpressed in Mouse Mammary Gland Adenocarcinomas and Human Breast Cancer Cell Lines1. Cancer Research. 2003;63(9):2179-87.
SYAP1	['BSTA', 'PRO3113']	Yes	Mamoor S. Differential expression of CASC5 in cancers of the breast. OSF Preprints; 2021. doi:10.31219/osf.io/jhkq8
MFSD4B	['KIAA1919', 'NaGLT1', 'SLC60A2']	Yes	Kuang Y, Wang Y, Cao X, Peng C, Gao H. New prognostic factors and scoring system for patients with acute myeloid leukemia. Oncology Letters. 2021;22. doi:10.3892/ol.2021.13084	Mas VR, Maluf DG, Stravitz R, Dumur CI, Clark B, Rodgers C, et al. Hepatocellular carcinoma in HCV-infected patients awaiting liver transplantation: Genes involved in tumor progression. Liver Transplantation. Wiley; 2004. pp. 607–620. doi:10.1002/lt.20118
C11orf96	['AG2']	Yes	Yu Z, Lu W, Su C, Lv Y, Ye Y, Guo B, et al. Single-Cell RNA-seq Identification of the Cellular Molecular Characteristics of Sporadic Bilateral Clear Cell Renal Cell Carcinoma. Frontiers in Oncology. 2021;11. doi:10.3389/fonc.2021.659251
FLNA	['ABP-280', 'ABPX', 'CSBS', 'CVD1', 'FGS2', 'FLN', 'FLN-A', 'FLN1', 'FMD', 'MNS', 'NHBP', 'OPD', 'OPD1', 'OPD2', 'XLVD', 'XMVD']	Yes	Guo Y, Li M, Bai G, Li X, Sun Z, Yang J, et al. Filamin A inhibits tumor progression through regulating BRCA1 expression in human breast cancer. Oncology Letters. 2018. doi:10.3892/ol.2018.9473
PAQR6	['PRdelta']	Yes	Yang M, Li JC, Tao C, Wu S, Liu B, Shu Q, et al. PAQR6 Upregulation Is Associated with AR Signaling and Unfavorite Prognosis in Prostate Cancers. Biomolecules. 2021;11: 1383. doi:10.3390/biom11091383
APPBP2	['APP-BP2', 'HS.84084', 'PAT1']	Yes	Zayas‐Santiago A, Martínez‐Montemayor MM, Colón‐Vázquez J, Ortiz‐Soto G, Cirino‐Simonet JG, Inyushin M. Accumulation of amyloid beta (Aβ) and amyloid precursor protein (APP) in tumors formed by a mouse xenograft model of inflammatory breast cancer. FEBS Open Bio. 2021;12: 95–105. doi:10.1002/2211-5463.13308
PDGFB	['c-sis', 'IBGC5', 'PDGF-2', 'PDGF2', 'SIS', 'SSV']	Yes	Lin L-H, Lin J-S, Yang C-C, Cheng H-W, Chang K-W, Liu C-J. Overexpression of Platelet-Derived Growth Factor and Its Receptor Are Correlated with Oral Tumorigenesis and Poor Prognosis in Oral Squamous Cell Carcinoma. International Journal of Molecular Sciences. MDPI AG; 2020. p. 2360. doi:10.3390/ijms21072360
