# Supplementary material for: Kozak Similarity Score Algorithm Identifies Alternative Translation Initiation Codons Implicated in Cancers
Source: Preprints.org preprint supplement (doi:10.20944/preprints202208.0413.v1), 2022-08-24
Supplement: Supplementary file 1 [file supplementary]

### Supplemental File 1. Predicted Upstream TICs Identified in Cancer Genes.

Below are the 5'UTRs of mRNAs from genes overexpressed in cancer. Codons colored in red have KSSs  $\geq 0.8$ . Upstream ATGs that may be used for translation are bolded. Potential alternative TISs are followed by their KSS score. NCBI Nucleotide accession numbers for each sequence are in parentheses.

#### **EPHA4** ([NM\\_001304536.2](#))

ACGCGTGCTCATCTTGTGTAAAAGTAAAAGTTGCTCATGTCATTAGCTCGGCTCTGAGTTTGCATGAGA  
sAACCAGCGCAGCTCTCGAGCCACGGGAGAAAACACGATCTGCTGCGGAGCCCAGTGACCTGAAACT  
GTAGCAGTGACTCGAGACCTGTCCTCTCCTCGACGTGCCCCATAACCCTCCCGCTTTATTTAGGATCC  
GCTTTTCCGAGAGCAGCCACTCAGGCAACCCCCGGAAGAAGCGGCAGGAGCAGCG**TTG(0.82)**GCACC  
GGCGAACC

#### **YY1** ([NM\\_003403.5](#))

CTCCCTCTGCCTTCTTCCCCACGGCCGGCCGCCTCCTCGCCCGCCCGCCCGCAGCCGAGGAGCCGAG  
GCCGCCGCGGCC**GTG(0.91)**GCGGCGGAGCCCTCAGCC

#### **ERBB2** ([NM\\_004448.4](#))

CCCCTCCATTGGGACCGGAGAAACC**AGG(0.87)**GGAGCCCCCGGGCAGCCGCGCGCCCCCTTCCCACG  
GGGCCCTTTACTGCGCCGCGCGCCCGGCCCCACCCCTCGCAGCACCCCGCGCCCCGCGCCCTCCCA  
GCCGGGTCCAGCCGGAGCC**ATG(0.86)**GGGCCGGAGCCGCAGTGAGCACC

#### **FOX2** ([NM\\_001031695.4](#))

CTTCAGCCATCTGCCTGAGATATGGGAGGGAGCTGGAGAAAG**AAG(0.81)**GAGGGGGAGAGACTGCC  
AGAGAGGAAGAGAAAAGAAAGGAAGAAACATTAGAAAGAAAAAGGAAGGAAAACGGTATAAAGAG  
AGATCAATTACCCACCCTTAAATAGCTAGATTGGGGGGGGAGGGGGGTGGAAAAGAAAGCTGTGGA  
GGTGTGCCCCAGC**ACG(0.88)**GCTGCTTTGAAAGGTTTATCATCTATCCGTTTGTTT

#### **KIT** ([OM304357.1](#))

TCTGGGGGCTCGGCTTTGCCGCGCTCGCTGCACTTGGGCGAGAGCTGGAAC**GTG(0.82)**GACCAGAGC  
TCGGATCCCATCGCAGCTACCGCG

**AXL** ([NM\\_021913.5](#))

GAGAAGGCGGCTGCTGGGCAGAGCCGGTGGCAAGGGCCTCCCCTGCCGCTGTGCCAGGCAGGCAGT  
GCCAAATCCGGGGAGC**CTG(0.87)**GAGCTGGGGGGAGGGCCGGGGACAGCCCGGCCCTGCCCCCTCC  
CCCGCTGGGAGCCCAACAACCTTCTGAGGAAAGTTTGGCACCC

**MYC** ([NM\\_002467.6](#))

AACTCGCTGTAGTAATTCCAGCGAGAGGCAGAGGGAGCGAGCGGGCGGCCGGCTAGG**GTG(0.80)**GA  
AGAGCCGGGCGAGCAGAGCTGCGCTGCGGGCGTCCTGGGAAGGGAGATCCGGAGCGAATAGGGGG  
CTTCGCCTCTGCCCCAGCCCTCCCGCTGATCCCCAGCCAGCGGTCCGCAACCCTTGCCGCATCCACG  
AACTTTGCCCATAGCAGCGGGCGGGCACTTTGCACTGGAACCTACAACACCCGAGC**AAG(0.84)**GAC  
GCGACTCTCCCGACGCGGGGAGGCTATTCTGCCCATTTGGGGACACTTCCCGCCGCTGCCAGGACCC  
GCTTCTCTGAAAGGCTCTCCTTGCACTGCTTAGACG

**MET** ([NM\\_001127500.3](#))

AGACACGTGCTGGGGCGGGCAGGCGAGCGCCTCAGTCTGGTCGCCTGGCGGTGCCTCCGGCCCCAA  
CGCGCCCGGGCCGCCGCGGGCCGCGCGCGCCGATGCCCGGCTGAGTCACTGGC**AGG(0.82)**GCAGCG  
CGCGTGTGGGAAGGGGCGGAGGGAGTGCGGCCGCGGGCGGGCGGGGCGCTGGGCTCAGCCCGGC  
CGCAGGTGACCCGAGGCCCTCGCCGCCCGCGGCGCCCCGAGCGCTTTGTGAGCAGATGCGGAGCC  
GAGTGGAGGGCGCGAGCCAGATGCGGGGCGACAGCTGACTTGCTGAGAGGAGGCGGGGAGGCGCG  
GAGCGCGCGTGTGGTCCTTGCGCCGCTGACTTCTCCACTGGTTCCTGGGCACCGAAAGATAAACCTCT  
CATA

**HP** ([AF026219.1](#))

CCCAGCCAGGAC**ATG(0.81)**GCCGCACCTCTCCTCATCAGGAGCGCCGGCTCACGGACTTCTCGCCCA  
ACTCCCTGAGCGCTCCCTCGTTTCGATCTTTAGAAAACCCTGCTTTCTTTCTGGGGCCGTGACG**AGG(0.82)**  
**GGCAGGGAGCGGCGAGCAAG(0.90)**GATGCGTTGAGGACCGCGAGGGCGCGCGTCTCGGGTGCCG  
**CCGTG(0.86)**GGTCCCGACGCGGAAGCCGAGCCGCCTCCGCCTGCCTCGACTTCCCCACAGCGTTCC  
GCCGCCGCTGCCGTGCTTGATGTGCAGAAAGAAGCCGGACACC

**EPHA1** ([NM\\_005232.5](#))

GCAAC**CTG(0.80)**GCGCTGCCATCCGGGCCACTGTCCCAGGTCCCGGCCCGGAGCT

**MYCN** ([NM\\_001293228.2](#))

AGGCTGTGACAGTCATCTGTCTGGACGCGCTGGGTGGATGCGGGGGGCTCCTGGGAACCTGTGTTGGA  
GCCGAGCAAGCGCTAGCCAGGCGCAAGCGCGCACAGACTGTAGCCATCCGAGGACACCCCCGCCCC  
CCCGGGCCACCCGGAGACACCCGCGCAGAATCGCCTCCGGATCCCCTGCAGTCGGCGGGAGGTAAG  
GAGC**AGG(0.83)**GCTTGCAAACCGCCCGCGCCAGGGAAGCGACGAGCGCCGGGGCAAGGCAAGC  
**CTG(0.80)**GACGGG**ATT(0.82)**GCGACGTGCGCACCGGGCGCCCTAATATGCCCCGGGGGACTGTTTCT  
GCTTCCGAAACAAAACCATCTCTGGGTTTTCCAGAAAAGCCAGTTCAGCCCCGAAGGCATC**CTG(0.**  
**87)**GCTAGAGGAGACCCGCCCTAATCCTTTTGAGCCCTTACCGGGGGGAGTAATGGCTTCTGCGAAA  
AGAAATTCCCTCGGCTCTAGAAGATCTGTCTGTGTTTGAGCTGTGCGAGAGCCGTGTTGGAGGTCGGC  
GCCGGCCCCCGCCTTCCGCGCCCCCCCACGGGAAGGAAGCACCCCCGGTATTAACGAACGGGGCG  
GAAAGAAGCCCTCAGTCGCCGGCCGGGAGGCGAGCCG

**FOXM1** ([NM\\_202002.3](#))

AACGCTCCGCCGGCGCCAATTTCAAACAGCGGAACAACTGAAAGCTCCGGTGCCAGACCCACCCC  
CGGCCCCGGCCCGGACCCCTCCCTCCCGGGATCCCCGGGGTTCCACCCCGCCCGCACCGCCG  
GGGACCCGGCCGGTCCGGCGCGAGCCCCCGTCCGGGGCC**CTG(0.84)**GCTCGGCCCCCAGG**TTG(0.85)**  
GAGGAGCCCGGAGCCCGCCTTCGGAGCTACGGCCTAACGGCGGCGGCGACTGCAGTCTGGAGGGTC  
CACACTTGTGATTCTCAATGGAGAGTGAAAACGCAGATTCATA

**KPNA2** ([NM\\_001320611.2](#))

GTTGACTAGGCCTCGGGGGCGACGTTCAATTGACCAGGCGGCTGAGTTTCGCGGGGTCTGCGGGTTTA  
GGGCGCCGACGCTCTGCAAACGGCAGCGGAGGCCTTAACGCGTCGCGGCCGGGAGAATCGGAGCGA  
GCCAGGCTTGAGGGCGAATGTCCCGGGAGGACTTGTGGCGGCC**CTG(0.81)**GTTTCGCCTCCTCCTTTC  
TCGTTGCATCTTCCCCGGC**GTG(0.83)**GGGGCAGGGGCTGGGGGTGGCAGTTGGGAGCACCGTCTCTG  
ACACCTAGGCCCCGGGGGTGGCTCTGCCACC**AAG(0.84)**TCGTAGGCGAGCGTAATGAAAGCAAAGAT  
AGCAAATTGTAAGGAGGGCTTTGACTTTTGTATCTTCTGAATGACGCACAGCTGATGTCATCCTAATT  
AAGCGCATTCACTCCTAGTCTCTGGAAATGCAATCAAATATGCGAGATGCGGCACTGCATTTTTAATG  
TTGACCATAATGTAATGATGAAGCAAATTTTTATTAAATTTTCGAGTCTGCACCTATTTTGGCCAAGTAA  
AGACAGTAAAATAGGGAGAGCCTCCTGAGGATCTGAATTTATTGCCCTGGCACATAATTTTAGCTCTT  
TCTCCCTTTGTCTCATAACC

**STAMBP** ([NM\\_006463.6](#))

GTTTCCGGAACCTCCGGGTGTCATCCGCGGGGAAAGGTGGGGAAGGGTCCCGGGAAC**GTG(0.88)**GTG  
GGGC**AGG(0.80)**GCCTCCGAGCGTGGTTGGAAGGGGATCGGCCGCCATGCTGCATCCCCTTTT

TGGAATTGCTCAACCAGGTGGTAACCGGCGCCGCTTCCTGGCCTTGGGAGGTGGTTCCTTTCTTAACCC  
ACAAGAACCTCTCCCAAGAGAACTTGGTCCTG

**MAP3K8** ([NM\\_005204.4](#))

ACTCGTCCGCTCCGCTCTGGACTGCGCGCCACGCTCTGGGGTCCGGCGCCCTG(0.82)GTTCTGCTTCT  
GCCGCTGCCGCCGCCGGATCCCAAGTGGCCCGGCTGCTCGGCTCCACAGGCCTGCAGCCAGCATC(9  
0)GCACCGAACCTTCGGGGGGCGCGGCTGGAGCGCTCGGCCGGCCTG(0.83)GGAGCGCCAAAG(0.85)  
GCCGCAGATGCAATCTTCTTACCGCGAAGAAGCCAGGGGAATAGGTAGCCACATCTTGTTCAGATA  
AGAAAGGAAGCTAACGCAGTATCTGCAAAGCCAGGAGTCTGACTCAGTACTTTTCTCACTCATGCATA  
CAAAGCAGCTAAAAATGACACAGCTTATTTACCATGCCCTGACACTGCACTGAGCACTTTATGAGCTT  
GAACTCTGTTAATCCTCACGACCACCTCATGAGACTCTCCAGAAAGAGCAACAGTA

**CDKN3** ([NM\\_005192.4](#))

ACCGGTGAGTCGCCGGCGCTGCAGAGGGAGGCGGCACTGGTCTCGACCTG(0.80)GGGCGGCCAGCG

**ADAR** ([NM\\_001111.5](#))

GAACCGGAGCCATCTTG(0.88)GGCCCCGGCGCGCAGACCCGCGGAGTTTCCCGTGCCGACGCCCCGGG  
GCCACTTCCAGTGCGGAGTAGCGGAGGCTG(0.81)GGGGCCTCGAGGGGCTGGCGCGGCCAGCGG  
TCGGGCCAGG(0.80)GTCGTGCCGCCGGCGGGTCGGGCCGGGCAATGCCTCGCGGGCGCA

**RCC1** ([NM\\_001048194.4](#))

AGAGGCCTGCAGAGCGCATGCTCTGGGGCAGTTCGCGGCCCGGCGGGGAGCGCCGGAGTTCCTTGT  
GGCCGACGTGCACCAG(0.85)GACAGGAAG

**COL11A1** ([NM\\_001854.4](#))

ACTGACGGCATGAAGCCTTTAGGGGCACACAGTACTCTCAGCTTGTTGGTGGAAGCCCCTCATCTGCC  
TTCATTCTGAAGGCTAGG(0.81)GCCCCGGCAGAGGAAGGATCAGAGGGTCGCGGCCGGAGGGTCCCCG  
CCGGTGGGGCCAACTCAGAGGGAGAGGAAAGGGCTAGAGACACGAAGAACGCAAACCATCAAATTT  
AGAAGAAAAAGCCCTTTGACTTTTCCCCCTCTCCCTCCCCAATGGCTGTGTAGCAAACATCCCTGGCG  
ATACCTTG(0.85)GAAAGGACGAAGTTGGTCTGCAGTCGAATTCGTGGGTTGAGTTCACAGTTGTGA  
GTGCGGGGCTCGGAG

**BUD31** ([NM\\_003910.4](#))

GTCGAGAAGCAGCTACCCAAGCTCCAGGAGCTTCCGGTATGTGTTTTCCCTCTGTTCTCGATTACCTTG(0.86)GCAACGGCTGAGGCGGGAGACCGGTGGTCTGCACCGTCCTG(0.80)GAGGGAGATATGAGTGGCTGGACTCTCAGCCAGCCACTGGGATGTGTTCTGGGCTTTGGACCTTGAGGCCGGAGAGAGCTCCCGAGAGGAGGCGGCGCCACGTTCTGTTCTTCTGAGGGGACGGTAGATTTGGGGGTTTTCTCTAGGATTCTCGCGCCGTTTCTCTGAAGAAACAGGACCAGAGAGGGAAGGTGACCTGAAAGTCACAGAATAATTTTTTAAGCTGAACAAGAATCCAAGCCTGCAACTGCAGAGACGAGAGATCTTCTGCTGTCTATACTCTTGGAAGCACATCCTAAGATCTTGCAGATTATCCTGTGGAAGGAAA

**KCNH2** ([NM\\_000238.4](#))

AACCCTTCCGCGGCCGGGGCCGAGCCGCAGGCGCTGCCCCAGCCGCGGGCGCTGGAGCGGCTGTCCGCGCGGTG(0.82)GCAGGCGGGAGCCAGGAGTCCGGGGCTCGGGCGGGCGGAGCGCAGCGCGGGGACGCGGCGGAGCGGGGCCCCGCGGCTCGGCGGGGGCCGGCAGACAGGTGTGCCGGCGGCGGGCGGCTCGCGTCAAGCGGCTCCAGGCCGGGCCCCGGGGTCCGGAGCGGGGAGCCGGGAGCCGAGCGAGGACC CGGCGCCCCGAGTCCAGTCTTG(0.82)GCCGCGCCCCGTGCTCGGCTTG(0.86)GCCGCGGGGTGCGGGG ACCACG(0.91)GCCCCGCCGGGCCACCCGAAGCCTAGTGCTGGGCCGGGCCGGGCCGGGGTGGGTGGGGCCCCGCCCGGCCCGCCCATGGGCTCAGG

**BCAP31** ([NM\\_001139457.2](#))

GATGGGCCTCCGGGACGGTGTGCCAGGCCGGGGCCAAGTCGGAGGCCCTCGCTCTGGGTGGGCGCTGGGGCCCGCGAGG(0.80)GCTACTGTAAGGACCCCTGGCTTCTGAGGATACTGCGTCTAGAACTTTCTCCGTATGGGGCCTTGAGGTGCTTGGTCGAGACCTGCCTTTGCGCTTGGTCCCGAATCCTGCCCTCTAGGAGTCGCTCTTGCGGGCCTCCAGCCCACCGGAGGCGAAGCGGCCCGGGCGGAAGGCCGCTGGATCCTCGAGGGAGGTGCCGTTTCTCTCCGCGGGCGCCGTG(0.89)GGGACGTG(0.82)GGAGGCGGGGCGTCGGCAGCGCTTGACTAGGTGCGGCCCTTG(0.82)GGCCTGCCTGGTAGCGGGGATTTGGGCCCGCAGAGCGCCCCGCTCTGCGGCTGAGTTCTGCCTGGCGGGGAAGGGAGCGCCCCG

**NME1** ([NM\\_198175.1](#))

GCAGAAGCGTTCCGTGCGTGCAAGTGCTGCGAACCACGTGGGTCCCGGGCGCGTTTTCGGGTGCTGGCGGCTGCAGCCGAGTTCAAACCTAAGCAGCTGGAAGGGCCCTGTGGCTAGGTACCATA(0.84)GAGTCTCTACACAGGACTAAGTCAGCCTG(0.86)GTGTGCAGGGGAGGCAGACACACAAACAGAAAATTGGACTACAGTGCTAAGATGCTGTAAGAAGAGGTAACTAAAGGACAGGAAGATGGGGCCAAGAG

**RPA3** ([NM\\_002947.5](#))

AAGCTACTCAGATAAGAGGCTCCAAGAGGACATTTTTGGATGTGAAAAACAATGAGAAGGAGGACAA CACACATTTACAATCGTCTTAATTTTGTACTCAGAAAAAGGATGTGAAGACAATGCACAGGGAATACA

ATAGTTTCAGATCTGTGTACAGTTTCCTTTTGCTTCATCTCCTGCAACAATGTAATGAAGACACCATGAT  
ATCATTAACATTTACACAAAAGGAAAATGAGGCTGAAATGGTGTGGGC **AAG(0.80)**GCCCAGGAATCT  
GGAGCATCCCTAACCAAGCAGGAGAGCACCTGGGATAGAGAAAGTGCTCAAGAATGTTCACTTACTG  
ATTACTACAATCAAAAAAAGATACGACACTAATTTACCACATTCTTCTTACTTATTTTATGAGATACTATT  
CTTCCAAG **GTG(0.81)**GAGAAAGTGAGAAAGTAGAGTGACGCAGCTAAGGGAGTAAATCGACCCCTCA  
GCCAACAAGTGGCAAAAGCCTGAAGAAAGTGATCAAGATCACTGATGACCCCGCTGCCCATCTCCAA  
GGGGGCGGGTATCACAACCCCGACGCCACACCACGTATCATTCCGCAAACTCCCGCGCCTCCACG  
CAGAACTGGCAAG **AGG(0.82)**GAAGGCGAGACAGCAGTGAACAGCTGGTACGCAGCACCCACAGCAC  
CGCGGCAGCAGCTAGTGCCGACTCCCGCCTAGCTCTTTTGA CTCTGTTTCGCGGGAAGAATGGGGAAAC  
AGTAAGGTTGCGGCGCCTCCCGCGAGACGAGGTACCTGAGG **CTG(0.80)**GCCCCGCAGTCCCCCGCCG  
CACCAGCACCGGAGCTTCACACCCCACTTCCGGGGTCAAGTCACCGCCGGGAATCCTGTGATCGCAG  
AAAGGTAGTCTCAGGTTCCGCCCTATCCAAGTCCCGCCTCCACTGCCTCTCGCCCTGTATCTGTCAAC  
TTCCGGGACGCCGCGCTACTAAGCAGCCAATCTCCACTTCCGGACTCATCCAGCCCCTTCTCCACC  
CCTTTCAGAGACAGCGCG **ATT(0.81)**GCGATTTAGGTTTCCGCGCATTTAATTGGCGAAG **CTG(0.81)**GA  
GCGCTAGTCTTCGCTGATTGGTGCCGAGAAATCTGCCCCATAGACACCCGCGGGGCGCACAGTTTCAG  
TCGTCCGTGGGTTCCCGCCAGCCGCGAGTCTTGACCATAATC

**ELOC** ([NM\\_005648.4](#))

CTTTCGACTGCCCCGGAACCCACCGGAGCAGGCAGCTGGGGGTGGGGGGGCGGCC **CTG(0.81)**GGAT  
AGGGGCTGTGGCAGTACGCGGGGACCCGGCTGCG **GTG(0.81)**GCTGCGGGACTGACGAGAACTACT  
AAAGTTCCTGGGGAAGCAAAGTAGAATTTATAAGAACAAA

**DRAP1** ([NM\\_006442.4](#))

GGGCGGCGAGCAGGCCCCGGGAGCCGGGAGGCTGCGGGCGGCGGCG **CTG(0.81)**GACCCGACGCGGC  
GAGAGAGGCCCCGAG

**UBE2S** ([NM\\_014501.3](#))

GGCTCAGTGCTGCCGGGCACCGGGGCGGCGGGTTGGTCTACGCTGTGCGCGGCGGACGTCCGAGGC  
AGCGGGGAGCGGAGCGGGGCCCGGGGCTCTCCAGGGCCGCAGCGGCAGCAGTTGGGCCCCC  
GCCCCGCGCGGCGGACCGAAGAACGCAGG **AAG(0.83)**GGGGCCGGGGGACCCGCCCCCGGCCGCG  
CGCAGCC

**PSMB8** ([NM\\_004159.5](#))

AAACTCCGCAGTGCTCAGCCAAGC **AGG(0.81)**GAGCAACGCTAGGAAGGGCGGGCAGAAAG **(0.80)**GG  
CACGCTCTTGTGGGTGACTACAGGTTAGGAGACCGTTGAAC **CTG(0.85)**GAGGGGCCCTAGG **ATG(0.8**

0)GACCCCGTGGAAGATTGAGAGACTGCGCCCTCTCCCTGGCGCCGCCTTCCCCTACACGCGGCGGG  
TATATTCTGTTGCAGTTGGCCCAGGACCTGTTTCCAAGACTCTGCCCCCTGCACTTCCGTCCCTCCTGG  
TTTTGTAAAGTG

***RNPS1*** ([NM\\_006711.5](#))

GGAGGTGTCGAGGCCGTG(0.84)GCCCCGGAAGTGGTCGGGGCCGCTGCGGACGGAAGGGCGCCTGTG  
CTTCGTCCGCTCGGCGGTGGCCCAGCCAGGCCCGCGGGACTCAGACCAGCGGGGAGCGCGGCCTCC  
GCCCTTGGGGCCCTCCCGCCGGGCGGAGACCCAAGCCCCAACGCCAGGCCCTGCCCTG(0.83)GAA  
GCGCTCGCGGCCCGGCGCCTGGACGGGGGAGTTGCTGCTCTTTGGCGTAAATTGCAATCGATTAGGG  
ATCGTTTCTCAGAATCAAGTTAGAAGTGAGAGTTCAGATAAGTGAGGCCGCCATT(0.88)GCTGCTTTGA  
ACACCTCAGAAGGGGAGA

**DLGAP5** ([NM\\_014750.5](#))

AAGTTTGAATTCGTGGAGGCTCGGGTTGTGAGGGTTCTGCTTCGGAGTCGGCGGTGGTCGTCCAGA  
CCGAGTGTTCTTTACTTTTTGTTTGAGGTTTACGCTAGAAGGTG(0.80)GCTCAGG

**MFAP2** ([NM\\_017459.3](#))

GCAACTTGGTCTCACA**GTG(0.80)**GCTTAGGCCAGGGTGGGAGCAGTGAACGGAGTCACAAAAGAAAT  
TTTTCAGCTGTCTCTCTGACACCACCCCGGCCTGCCTCTTTGTTGCC

**USP7** ([NM\\_003470.3](#))

GACATTTTACGCCGCCCATTTTGAGAGCGAGCCGAGCCGAGCTGCCGGGCGCCGCGTCCGCTGCC  
GGAGCCCCGACG**ACG(0.80)**ACGCCGAGGAGGCGGAGGCCGCGGCTCTCGAACGCGGCCGGCCCCG  
TCGCCCCGCCGCTCCGCCGCTCCCGCCGGCCCCAGGGCCCCGAGGCCCGCCGCGGCCGAGGCC  
TCCCGTCCGCCGCGCCCGGCCGAGGCGGGGCTGACTCCGCGGCCCCCGACCGGCCGCCCTCCGCC  
CCCGGCCGCCCCGCGGCCCGCAGCCCCGGCCCCGGCCCCGGCGGCGGGAGGCGGGCCCCGCGGC  
GGCGGGCGGGCGGCCGAGCGAGCGACGAGGCCGCCCGGCCCGGCCCGGCCGCCGCCGCCGCCG  
CTCGGCGCCGAG**ATT(0.80)**GGGCGAATCGCGAGCAAGTACGTGCGGTCTCCCTGCCGCCGCCGCCG  
CCCGCCGCGGGCCGCCCGGGGCCGCGTCGCCGACGACGCGCGGGAGGAGGAGGAGGAGGCCGC  
CCCGCCGCCGCCGCCGCCGCCGCCGCCGCCGCCGCTCGCCGCCGCCGCCGCCGCCGCCGCCGCCG  
GCCCCCGGCCCGCAGGCGAGGCCAGGCCGCGGCCGAC

**LAGE3** ([NM 006014.5](#))

CTCGCGGGGTGCGCCTCTGGGATAGGCGACCACG(0.85)GTGTCTTCAAAGCCCCGTCAGGGTTGGC  
TTCCTGGGGCCGGACCGACTGTGGGTCAGTTTGACACAGCGCTCTGGAATCGAGTTACGCGCGAAAG

GGCAGAGTTTCTGGAGGAAACCGCAGCCTCTCAACCGCTGACCGGGTCTCAGAAGGCCCCCGGCAGG  
(0.86)GCCGCTTGCGGGAACTGACCACGCGCCAGTCAGGCTCTCCAGGGACCTGCGCAGGCGCGTGT  
GGGCGGAGTCGTGCGCAGGGGGCGGGGCTTCGGGAAGGAGCCACAGAGAGG(0.80)GCGGGGCGTA  
GGACCTGCGCTTCGGGGGTGGAGTCGGAGCGGCGCGGCGGCGGTC

***NUTF2*** ([NM\\_005796.3](#))

GCAGACCGCGCTGGGTTGCCGCTGCCGCTGCCGCCATC(0.86)GTGCCAGCCCCTCGGGTCTCCGTGA  
GGCCGGGTGACGCTCCAGA

***TRIM28*** ([NM\\_005762.3](#))

AGTGACGCAGAGGCTGGAGACGACTCTACGGCGGCGAAGAGACGCGGGTTGAGGAAGAGGGACGG  
ATTGCCCATGCGCTTGGGCGCACAGCGGCCCGCTTCTGTGTGGTCTGGAGGTGGAGCTGAGAGGGGA  
ATCACACTCTATAAAGTTTCGCATACCCCACTGGCGGATTCAATTGCGGCAGTGACGTCACAGAGGCC  
CCGCCCCGCCCCACAAGAGCCCCACCGACGTG(0.83)GGGTTG(0.82)GCGGTGGTGAAGGACTAG  
GAGTTGGCGCGTGCGTACTGGCGGCCTCTCCCGCACCGACCGGCCTG(0.80)GGCCCCGCCCCGGGC  
GTGAGGCGCCCAATGCGCGTGCGCGGCGGCGTCGGCGCCAGTTATTTCTGTCCCCGCCCCCGGCCTC  
GGCTCTTTCTGCGAGCGGGCGCGCGGGCGAGCGGTTGTGCTTGTGCTTGTGGCGCGTGGTGCGGGTTT  
CGGCGGCGGCTGAGGAAGAAGCGCGGGCGGCGCCTTCGGGAGGCGAGCAGGCAGCAGTTGGCCGT  
GCCGTAGCAGCGTCCCGCGCGCGGCGGGCAGCGGCCAGGAGGCGCGTGCGGCGGCTCGGCCTCGC  
GGCGGCGGCGGCGGCAGCGGCCAGCAGTTGGCGGCGAGCGCGTCTGCGCCTGCGCGGCGGGCCC  
CGCGCCCCTCCTCCCCCCTGGGCGCCCCCGGCGGCGTGTGA

***PTDSS1*** ([NM\\_014754.3](#))

CCCTCTGCTCCAGCCTTTGCTGGGCGCCAGACCCGGCTTTGCCGTCCGGCTATTAGCCTACTGTGGCT  
AGTACCCCCGGGTCCCGGCCTTCTCGGGCTGGGGCCCGGCCACCGCGGCAGGACG(0.83)GGGA  
GGCGGGCC

***TCEA1*** ([NM\\_006756.4](#))

AGCCGGAAGCCACGCCTGCCCCTAGCCCGACGCCCCTGGCGGGAACATG(0.85)GGCTCGCCCC  
TCACCAGCGATCTGCAGTCAGTTGGTAGCGCCTGCACGTCGCGCGCGGTGTTGATTGTCGCTGCCTG  
GGGAGGAGGAGCCGGAGCCGCCGCCGCCGCCGCCGCCGGGCTTCGTTTCGTAAGGAAG(0.82)  
GGGGCCTAGGCCCGGGCCTGCGGTGGTGGGGTTGCTGCGCGCCGGGGTTCGCTCCTGCTGTGTCTT  
CCGCTCCAGCTTCGCCCACTTCCCTTGCCAGCGGGGTGGGCGCGGAGAAGACCTGCCGGAGCC



**PCNA** ([NM\\_002592.2](#))

GGATGGCCGGAGCTGGCGCCCTG(0.85)GTTCTGGAGGTAACCGTTACTGAGGGCGAGAAGCGCCAC  
CCGGAGGCTCTAGCCTGACAAATGCTTGCTGACCTGGGCCAGAGCTCTTCCCTTACGCAAGTCTCAGC  
CGGTCGTCGCGACGTTGCCCCGCTCGCTCTGAGGCTCCTGAAGCCGAAACCAGCTAGACTTTCCTCCT  
TCCCGCCTGCCTGTAGCGGCGTTGTTGCCACTCCGCCACC

**FDPS** ([NM\\_002004.4](#))

GGGAACTACTCGACCCACAGAGCCGATCGCGGAGCGGATTCTGCTTTTAGGAGTACCCGCCAACAG(0.80)CGGGACCGAGCAGGAATCCGTATCTGGGAACAGG

**PSMD2** ([NM\\_002808.5](#))

GCAGCGGGCCGGCAGTG(0.81)GCGGCGGAG

**HMGA1** ([NM\\_145899.3](#))

CTTTTAAAGTCCCCTGAGCCGGTGCTGCGCTCCTCTAATTGGGACTCCGAGCCGGGGCTATTTCTGGC  
GCTGGCGCGGCTCCAAGAG(0.83)GCATCCGCATTTGCTACCAGCGGCGGCCGCGGCGGAGCCAGG  
CCGGTCCTCAGCGCCCAGCACCGCCGCTCCCGGCAACCCGGAGCGCGCACCGCAGGCCGGCGGCCG  
AGCTCGCGCATCCCAGCCATCACTCTTCCACCTGCTCCTTAGAGAAGGGAAG

**KPNB1** ([NM\\_002265.6](#))

CCCTCCCTGCGCGCCGCTCTCACTCACAGCCTCCCTTCCTTCTTTCTCCCTCCGCCTCCCGAGCACCA  
GCGCGCTCTGAGCTGCCCCAGGGTCCCTCCCCCGCCGCCAGCAGCCCATTGGAGGGAGGAAGTAA  
GGGAAGAGGAGAGGAGAG(0.80)GGGAGCCGGACCGACTACCCAGACAGAGCCGGTGAATGGGTTTGT  
GGTGACCCCCGCCCCCACCACCCCTCCCTTCCCACCCGACCCCAACCCCATCCCCAGTTCGAGC  
CGCCGCCCCGAAAGGCCGGGCGCGTCGTCTTAGGAGGAGTCGCCGCCGCCGCCACCTCCGCC

**DYNLL1** ([NM\\_001037494.2](#))

CTTCGGGCGCTGACAGG(0.84)GAGAGCCTG(0.85)GGGCCGGGCCGTGTGGATGCCATCCCCGAGCGC  
GGTTCGCGCTCGGCTGAGGCGCTGGACAAGTGGCTTGGGCTCCCGCGCCTCAGTTTCTCTCTGTGGCG  
CCGCCTACCTCACAGACTTGTGAGCACTCACTGACGTGGGTAGCGCCAGGGCCTGCGGGGCGCAGG

AGAGCTG(0.80)GAGTCAGGCGGAGACCGCAGGCTGACCCCGCAGCGGCCGGGCTGTCGCGGCCCCC  
ACCTCAGGTAACC

***RUNX*** ([NM\\_001024630.4](#))

ATTGCCTCACAAACAACCACAGAACCACAAGTGCGGTGCAAACTTTCTCCAGGAGGACAGCAAG(0.8  
1)AAGTCTCTGGTTTTTAAATGGTTAATCTCCGCAGGTCCTACCAGCCACCGAGACCAACAGAGTCAT  
TTAAGGCTGCAAGCAGTATTTACAACAGAGGGTACAAGTTCTATCTGAAAAAAAAAAGGAGGGACT

***MRPL3*** ([NM\\_007208.4](#))

CAGAGAGCATC(0.82)GGCCGGCGACCGTTCCGGCGGCCATT(0.84)GCGAAAACCTCCCCACGGCTAC  
TGCGTCCACGTGGCGGTGGCGTGGGGACTCCCTGAAAGCAGAGCGGCAGG(0.83)GCGCCCGGAAGT  
CGTGAGTCGAGTCTTCCCGGGCTAATCC

***SPP1*** ([NM\\_001040058.2](#))

AGCAGCAGGAGGAGGCAGAGCACAGCATC(0.84)GTCGGGACCAGACTCGTCTCAGGCCAGTTGCAG  
CCTTCTCAGCCAAACGCCGACCAG(0.83)GAAAACCTCACTACC

***SNRPD2*** ([NM\\_004597.6](#))

GCGTCCCAGAGGGAAGAGGGGCGGTGCCTGTCTCCGAAGCGAGGAGCGGATTGGCTTCACGGAGGC  
CGCGCCCCCGAAGTCACG(0.83)GCCGGCGGGCATTGGAAATAGCTTGTCATTTCCCTCCTTCAACCT  
GTACCATTCTTCAAGAAACGGCGCCAACGGAAGTGGGTCGCAGGAAGAGGAAGTCCCGCCTCTCTCT  
CCTCAGGCAGCAGCAACGCGGAGGAAACGGGAGTGAACGGAGAGCGTAGTGACCATC

***UCHL3*** ([NM\\_001270952.2](#))

GCTCGGCAAGGCTCGGCTCGGAAGAGTCCAAGCGTGAGGGGAGAGGGCTGTGGATTCAGATACTGTT  
TTTCTCCCGAAATAGGAAATTGGCTTATTTTTTCTCCTCGGCAGCATCTTAATTTAAAATATGACACTTG  
ACCTACGGCCCTGCACGGAGCGGTTAAGAGG(0.80)GTCACCAACCAGTTTCTTAAACAATTAGGTCTA  
CATCCTAACTGGCAATTCGTTGATGTATATGGA
