# Supplementary material for: Kozak Similarity Score Algorithm Identifies Alternative Translation Initiation Codons Implicated in Cancers
Source: Preprints.org preprint supplement (doi:10.20944/preprints202208.0413.v1), 2022-08-24
Supplement: Supplementary file 2 [file Supplemental Table 2-Alternative TICs in Genes Associated with Cancer.xlsx]

## Sheet: Sheet1
Gene	Translation Initiation Codon (TIC) with Flanking Sequence	Kozak Similarity Score (KSS)	Nucleotide ID of Transcript
UBE2M	GGCCGGGCGG GTG GCGGCAGCAG	0.684507	NM_003969.4
GDI1	GTCCAGTGCG GTG GCGGCGGCGG	0.802641	NM_001493.3
GDI1	GGCGGCGGCG GTG GCGGCGGCGA	0.858979	NM_001493.3
TRAPPC12	GACCTTGGTC ACG GCCGCAGGTG	0.791549	NM_016030.6
MORC4	GACGGGTACC GTG GCGGCCAAAA	0.901056	NM_001085354.3
ORC5	GTCCTGTGGG CTG GCTGCACTGG	0.743486	NM_002553.4
NOP2	GGGACGAAGA GTG GCAGCACTGA	0.774472	NM_001033714.3
HDGF	CGGAGACGCC GTG GCCGCGCCGG	0.912676	NM_004494.3
CHTOP	CGGAGCCGTG GTG GCAGCCCCGG	0.819718	NM_001206612.2
C1orf122	CAACCCCACG CTG GCAGCCACCG	0.861972	NM_001142726.2
ZNF48	GGGCGCCGGG GTG GCGGAGCCGG	0.847887	NM_001214909.2
FXR2	TTCCCTCACG GTG GCGGAGACCA	0.858979	NM_004860.4
HM13	TTAGGGGAAC GTG GCTTTCCCTG	0.853521	NM_178580.3
RNF31	GCGCCGGGTC CTG GCGGGCGGCG	0.819542	NM_017999.5
USP33	GTTGGTCGAG CTG GCGGGTCCCG	0.814085	NM_201624.3
MAF	GCCCGGCAAG CTG GCTCACCCGC	0.850528	NM_005360.5
KCTD9	GGGCAGGAAG GTG GCGAAGGGAG	0.830579	NM_017634.4
USP9X	AGCAGACAAA ATT GCAAAGATCT	0.819312	NM_001039591.3
GNPNAT1	GGAGGTGGGG CTG GCGCTGAAGC	0.785915	NM_198066.4
STARD10	TCCCAGGAAG GTG GCGTCAGCAT	0.797007	NM_006645.3
NARS1	GAGTCATAAG ACG GCGTCGGTGT	0.79419	NM_004539.4
RANBP2	CCTCTTGGAA GTG GCGACTGCTG	0.743079	NM_006267.5
RGPD6	CCTCTTGGAA GTG GCGACTGCTG	0.743079	NM_001123363.4
SLF2	CAGCAGCAAG ACG GCAACCACGC	0.824946	NM_001243770.2
SLC35A3	CTGCACCGAG CTG GCGGTGGCTA	0.805458	NM_001271684.2
MARCHF5	CCCCGGGAAG CTG GGTGACGGGT	0.805458	NM_017824.5
KCTD3	CGCCGGGAAG GTG GGGGAAGCCC	0.822535	NM_016121.5
HNRNPAB	CAGCGCGAGC TTG AGTGCGGCCG	0.794366	NM_004499.4
OXSR1	CGGCGAGGAG ACG AGCGAGGTCA	0.689965	NM_005109.3
YTHDC1	AGACGGACTG ACG GACGGGCCCG	0.630986	NM_133370.4
TXN	GTTTGGTGCT TTG GATCCATTTC	0.658979	NM_003329.4
TCAF1	AGCGTAGACT CTG GACCAGGAGA	0.746303	NM_014719.3
IFT46	TATAGAGGAG ACG GATTCAGAAG	0.729577	NM_020153.4
SATB2	ACTTTCCACC CTG GATTCTCTAC	0.842077	NM_001172509.2
KCTD3	GCCGCGAAAG GTG GAGGCCGGGC	0.825176	NM_016121.5
ZNF281	TTTTTATTAA CTG GAGGCGACGG	0.563204	NM_001281293.2
NME1-NME2	ACCTAAGCAG CTG GAAGGAACCA	0.57993	NM_001018136.3
GYS1	GGGTCCCTAC CTG GAGATCCCCG	0.701002	NM_002103.5
NDUFA2	GCCTGAAGAC CTG GAATTGGCGA	0.794014	NM_002488.5
KAT7	AGAGGCCGCC ACG GAGCCCGCCG	0.895775	NM_001199158.2
INTS8	AAGTGTCAGG TTG GAGCCGGGAA	0.825176	NM_017864.4
AP3D1	GGCGGCAGGC ACG GGCCCCGGGC	0.819718	NM_001261826.3
RPRD2	CGCACTCGCA GTG ATTGTTTTGC	0.653521	NM_001297673.2
TP53	CGACGGTGAC ACG CTTCCCTGGA	0.689789	NM_001276696.3
NACC1	CCCACAATGA ATG GCCGCCGCGG	0.616725	NM_052876.4
TM9SF3	GGTGACGGCG ACG GCGGCGGCAG	0.819718	NM_020123.4
ACOT7	CTCTGCAGCC TTG GCGGCCTGGG	0.895775	NM_007274.4
UBE2J2	GGCCTCGACT ACG GCGAGCCTGA	0.790967	NM_194458.2
PGRMC1	GGAGGAGAAA GTG GCGAGTTCCG	0.808044	NM_006667.5
TM9SF3	GCGGGCGGTG ACG GCGACGGCGG	0.805051	NM_020123.4
CDV3	GCCCGGCAGC GTG AGCGCAGAGC	0.79419	NM_017548.5
CLK2	TGTCGCCGCC ATC ACGGACTTCC	0.814085	NM_001294339.2
OCIAD1	CCCTGTCTGG ATG ACTTCTTGCG	0.571655	NM_001079840.3
CLK2	CGCCGCCATC ACG GACTTCCTGT	0.878873	NM_001294339.2
ZC3H10	AGCAGCAACT ACG GCGGCGGCGG	0.856338	NM_032786.3
RPL35A	TGGAGGCCTG CTG GGAACGGGAC	0.60241	NM_000996.4
TNPO1	TTCCGCAGCC ATT TCAGGCCCCG	0.75446	NM_002270.4
ZNF586	CCATCCGGCG ATG CTGGGTCTGG	0.642077	NM_001204814.2
HNRNPR	GCGCCTCGCG CTG ATTCTCACGG	0.678697	NM_005826.5
TXN	GGTGCTTTGG ATC CATTTCCATC	0.444894	NM_003329.4
MED15	GGGAACAGGC ATG GACGTTTCCG	0.788732	NM_001293235.2
RPL35A	CCTGCTGGGA ACG GGACTTCTAA	0.644718	NM_000996.4
HSP90AA1	GCGTCCCGGT GTG GCTGTGCCGT	0.7125	NM_005348.4
KRT23	CTGTTCTGAG CTG GCTTTCCCTT	0.709683	NM_001282433.2
RGS14	CGTGCAAGCT CTG GCCGGCGCTG	0.729577	NM_001366618.1
EPB41L3	GCAGCAGGCC CTG GAGCAGTTCG	0.808275	NM_001384697.1
SLC4A4	GGCGGCCGCG GTG GCAGCGAAGG	0.861972	NM_001098484.3
ZDHHC2	AGTTAGCGCC ACG GCGGCGGCAG	0.88169	NM_016353.5
TNS1	TGCAGGAAAG GTG GCTGCCCCCT	0.84507	NM_022648.7
YBX1	CCAGAGAGCC CTG AGCAGCCCCA	0.695016	NM_004559.5
ICE1	TGCTAGCCCC ACG GGGACCTCTG	0.692551	NM_015325.3
STOM	GGCAACGAGG ACG GGGGAGTGCG	0.8	NM_004099.6
METTL9	GTACGTGAAC ATG ACTAGCGGCC	0.791143	NM_016025.5
PPP2R5A	CCGTGAGGCG TTG GCGGGCGGCG	0.816725	NM_006243.4
NMNAT3	TAAAAGCAGG GTG GCCACTGCAA	0.782516	NM_001401600.1
LMOD1	CTGATAGCCC CTG GCAGCCACAG	0.690141	NM_012134.3
MYLK	TCCAACCCTC GTG TCTATTTTCC	0.553877	NM_053032.4
YTHDC1	GGCAGACGGA CTG ACGGACGGGC	0.71831	NM_001031732.4
KHK	CCCTGCACCC CTG GCCGCTGCAG	0.737852	NM_000221.3
RHOC	TTCCTGCAGC CTG GGAACTTCAG	0.805227	NM_175744.5
CDR2	GAGGGCGGCT CTG GCTGAGGGCG	0.752113	NM_001802.2
ANKS1B	ATCTGTCAAG CTG GCGGGCTCCT	0.859155	NM_181670.4
THOP1	TCAGGCGGCC GTG GCGGCGGTGG	0.889965	NM_003249.5
NAPB	TGAGGGGGCT GTG GCGGCCGCGG	0.777465	NM_001283018.2
RHOT1	GCCGAAGAGG CTG GCAGGTGGCG	0.785739	NM_001033568.3
OCIAD1	CCCTGTCTGG ATG ACTTCTTGCG	0.571655	NM_017830.4
TRMT6	GAGGCTGGCG GTG GCGACAACCG	0.785509	NM_015939.5
ZNF586	CCATCCGGCG ATG CTGGGTCTGG	0.642077	NM_017652.4
HSPB1	AAATACCCGA CTG GAGGAGCATA	0.588556	MW881016.1
ARL6IP5	GCCGACCGAG ACG GAGCCGCTGT	0.788556	NM_006407.4
VAT1	TTCCCCAGCT GTG CACTCTCCAT	0.566197	NM_006373.4
CNP	CCCCGGAGCG CTG GTGCCGGCAG	0.79419	NM_033133.5
ABLIM1	AACTTGAAGC CTG GAGGAGTTCT	0.825352	NM_006720.4
SEPTIN9	GAGGGCCGAG GTG TTGGGCCACA	0.686678	NM_001113491.2
SYAP1	GTCGCGCAGA GTG GAGTCAAAGG	0.788732	NM_032796.4
MFSD4B	AGCCGCCGAG CTG GAGTTAGAGG	0.819718	NM_153369.4
C11orf96	CGCAGCAGAT TTG GATCCCCCGC	0.732394	NM_001145033.2
FLNA	CTCGCCGAGG CTG CAGCACCGCC	0.687324	NM_001456.4
PAQR6	AGAGGTCAAC GTG GAGGTACCAG	0.898592	NM_024897.4
APPBP2	GGGGTTCGCT ACG GAGGGAGGTG	0.723944	NM_006380.5
PDGFB	CCCCCCAGCG ACG GAGCCGGGGC	0.797007	NM_002608.4
